# Supplementary material for: Target 5000: Target Capture Sequencing for Inherited Retinal Degenerations
Source: Genes (Basel). 2017 Nov 3;8(11):304. doi: 10.3390/genes8110304 (PMC5704217; doi:10.3390/genes8110304)
Supplement: Supplementary file 1 [file genes-08-00304-s001.pdf]

Supplementary Materials

Target 5000: Target Capture Sequencing for Inherited Retinal Degenerations

Adrian Dockery <sup>1,\*</sup>, Kirk Stephenson <sup>2</sup>, David Keegan <sup>2</sup>, Niamh Wynne <sup>3</sup>, Giuliana Silvestri <sup>4,5</sup>, Peter Humphries <sup>1</sup>, Paul F. Kenna <sup>1,3</sup>, Matthew Carrigan <sup>1,†</sup> and G. Jane Farrar <sup>1,†</sup>

Table S1. Full list of genes captured in NGS panel.

|                 |                 |                |               |                 |                |                |                 |                 |               |
|-----------------|-----------------|----------------|---------------|-----------------|----------------|----------------|-----------------|-----------------|---------------|
| <b>A</b>        | <i>BBS9</i>     | <i>CNGB3</i>   | <i>GNAT1</i>  | <b>K</b>        | <i>NEK2</i>    | <i>PEX1</i>    | <i>RDH12</i>    | <b>T</b>        | <i>WFS1</i>   |
| <i>ADIPOR1</i>  | <i>BEST1</i>    | <i>CNNM4</i>   | <i>GNAT2</i>  | <i>KCNJ13</i>   | <i>NEUROD1</i> | <i>PEX2</i>    | <i>RDH5</i>     | <i>TEAD1</i>    | <i>WFS1</i>   |
| <i>ABCA4</i>    | <b>C</b>        | <i>COL11A1</i> | <i>GNB3</i>   | <i>KCNV2</i>    | <i>NMNAT1</i>  | <i>PEX7</i>    | <i>RGR</i>      | <i>TIMM8A</i>   | <i>WHRN</i>   |
| <i>ABCC6</i>    | <i>C12orf65</i> | <i>COL2A1</i>  | <i>GNPTG</i>  | <i>KIAA1549</i> | <i>NPHP1</i>   | <i>PGK1</i>    | <i>RGS9</i>     | <i>TIMP3</i>    | <b>Z</b>      |
| <i>ABHD12</i>   | <i>C1QTNF5</i>  | <i>COL9A1</i>  | <i>GPR179</i> | <i>KIF11</i>    | <i>NPHP3</i>   | <i>PHYH</i>    | <i>RGS9BP</i>   | <i>TMEM126A</i> | <i>ZNF408</i> |
| <i>ACBD5</i>    | <i>C21orf2</i>  | <i>CRB1</i>    | <i>GRK1</i>   | <i>KIZ</i>      | <i>NPHP4</i>   | <i>PITPNM3</i> | <i>RHO</i>      | <i>TMEM216</i>  | <i>ZNF423</i> |
| <i>ADAM9</i>    | <i>C2orf71</i>  | <i>CRX</i>     | <i>GRM6</i>   | <i>KLHL7</i>    | <i>NR2E3</i>   | <i>PLA2G5</i>  | <i>RIMS1</i>    | <i>TMEM237</i>  | <i>ZNF513</i> |
| <i>ADAMTS18</i> | <i>C8orf37</i>  | <i>CSPP1</i>   | <i>GUCA1A</i> | <b>L</b>        | <i>NR2F1</i>   | <i>PLK4</i>    | <i>RLBP1</i>    | <i>TOPORS</i>   |               |
| <i>ADGRA3</i>   | <i>CA4</i>      | <i>CTBP2</i>   | <i>GUCA1B</i> | <i>LAMA1</i>    | <i>NRL</i>     | <i>PNPLA6</i>  | <i>ROM1</i>     | <i>TREX1</i>    |               |
| <i>ADGRV1</i>   | <i>CABP4</i>    | <i>CTNNA1</i>  | <i>GUCY2D</i> | <i>LCA5</i>     | <i>NYX</i>     | <i>POC1B</i>   | <i>RP1</i>      | <i>TRIM32</i>   |               |
| <i>ADIPOR1</i>  | <i>CACNA1F</i>  | <i>CYP4V2</i>  | <b>H</b>      | <i>LRAT</i>     | <b>O</b>       | <i>POMGNT1</i> | <i>RP1L1</i>    | <i>TRNT1</i>    |               |
| <i>AGBL5</i>    | <i>CACNA2D4</i> | <b>D</b>       | <i>HARS</i>   | <i>LRIT3</i>    | <i>OAT</i>     | <i>PRCD</i>    | <i>RP2</i>      | <i>TRPM1</i>    |               |
| <i>AHI1</i>     | <i>CAPN5</i>    | <i>DHDDS</i>   | <i>HGSNAT</i> | <i>LRP5</i>     | <i>OFD1</i>    | <i>PRDM13</i>  | <i>RP9</i>      | <i>TSPAN12</i>  |               |
| <i>AIPL1</i>    | <i>CC2D2A</i>   | <i>DHX38</i>   | <i>HK1</i>    | <i>LZTFL1</i>   | <i>OPA1</i>    | <i>PROM1</i>   | <i>RPE65</i>    | <i>TTC8</i>     |               |
| <i>ALMS1</i>    | <i>CDH23</i>    | <i>DMD</i>     | <i>HMCN1</i>  | <b>M</b>        | <i>OPA3</i>    | <i>PRPF3</i>   | <i>RPGR</i>     | <i>TTL5</i>     |               |
| <i>ARL2BP</i>   | <i>CDH3</i>     | <i>DRAM2</i>   | <i>HMX1</i>   | <i>MAK</i>      | <i>OPN1LW</i>  | <i>PRPF31</i>  | <i>RPGR</i>     | <i>TTPA</i>     |               |
| <i>ARL3</i>     | <i>CDHR1</i>    | <i>DTHD1</i>   | <b>I</b>      | <i>MAPKAPK3</i> | <i>OPN1MW</i>  | <i>PRPF4</i>   | <i>RPGRIP1</i>  | <i>TUB</i>      |               |
| <i>ARL6</i>     | <i>CEP164</i>   | <b>E</b>       | <i>IDH3B</i>  | <i>MERTK</i>    | <i>OPN1SW</i>  | <i>PRPF6</i>   | <i>RPGRIP1L</i> | <i>TUBGCP4</i>  |               |
| <i>ASRGL1</i>   | <i>CEP250</i>   | <i>EFEMP1</i>  | <i>IFT140</i> | <i>MFN2</i>     | <i>OTX2</i>    | <i>PRPF8</i>   | <i>RS1</i>      | <i>TUBGCP6</i>  |               |
| <i>ATF6</i>     | <i>CEP290</i>   | <i>ELOVL4</i>  | <i>IFT172</i> | <i>MFRP</i>     | <b>P</b>       | <i>PRPH2</i>   | <i>RTN4IP1</i>  | <i>TULP1</i>    |               |
| <i>ATXN7</i>    | <i>CERKL</i>    | <i>EMC1</i>    | <i>IFT27</i>  | <i>MFSB8</i>    | <i>PANK2</i>   | <i>PRPS1</i>   | <b>S</b>        | <b>U</b>        |               |
| <b>B</b>        | <i>CFH</i>      | <i>EXOSC2</i>  | <i>IMPDH1</i> | <i>MIR204</i>   | <i>PAX2</i>    | <b>R</b>       | <i>SAG</i>      | <i>UNC119</i>   |               |
| <i>BBIP1</i>    | <i>CHM</i>      | <i>EYS</i>     | <i>IMPG1</i>  | <i>MKKS</i>     | <i>PCDH15</i>  | <i>RAB28</i>   | <i>SDCCAG8</i>  | <i>USH1C</i>    |               |
| <i>BBS1</i>     | <i>CIB2</i>     | <b>F</b>       | <i>IMPG2</i>  | <i>MKS1</i>     | <i>PCYT1A</i>  | <i>RAX2</i>    | <i>SEMA4A</i>   | <i>USH1G</i>    |               |
| <i>BBS10</i>    | <i>CLN3</i>     | <i>FAM161A</i> | <i>INPP5E</i> | <i>MTTP</i>     | <i>PDE6A</i>   | <i>RB1</i>     | <i>SLC24A1</i>  | <i>USH2A</i>    |               |
| <i>BBS12</i>    | <i>CLRN1</i>    | <i>FLVCR1</i>  | <i>INVS</i>   | <i>MVK</i>      | <i>PDE6B</i>   | <i>RBP3</i>    | <i>SLC25A46</i> | <b>V</b>        |               |
| <i>BBS2</i>     | <i>CLUAP1</i>   | <i>FSCN2</i>   | <i>IQCB1</i>  | <i>MYO7A</i>    | <i>PDE6C</i>   | <i>RBP4</i>    | <i>SLC7A14</i>  | <i>VCAN</i>     |               |
| <i>BBS4</i>     | <i>CNGA1</i>    | <i>FZD4</i>    | <i>ITM2B</i>  | <b>N</b>        | <i>PDE6G</i>   | <i>RCBTB1</i>  | <i>SNRNP200</i> | <b>W</b>        |               |
| <i>BBS5</i>     | <i>CNGA3</i>    | <b>G</b>       | <b>J</b>      | <i>NBA5</i>     | <i>PDE6H</i>   | <i>RD3</i>     | <i>SPATA7</i>   | <i>WDPCP</i>    |               |
| <i>BBS7</i>     | <i>CNGB1</i>    | <i>GDF6</i>    | <i>JAG1</i>   | <i>NDP</i>      | <i>PDZD7</i>   | <i>RDH11</i>   | <i>SPP2</i>     | <i>WDR19</i>    |               |

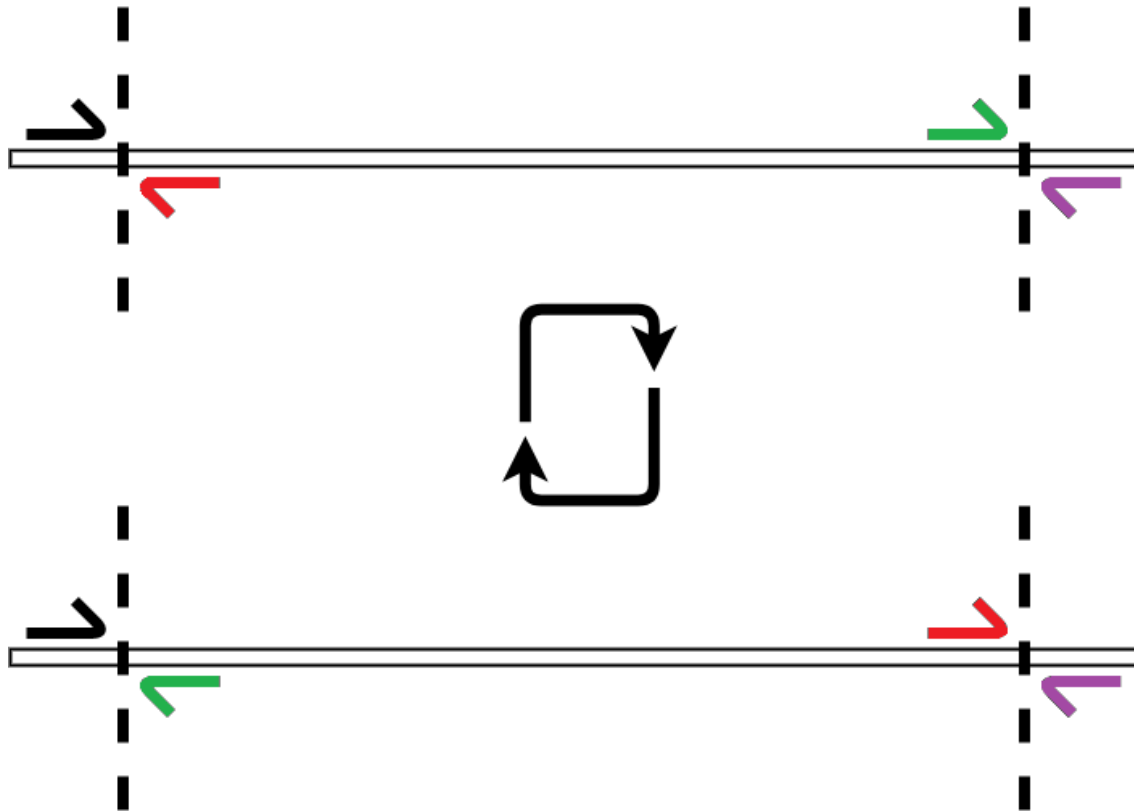

**Figure S1.** An illustration of the PCR strategy designed to detect a large homozygous inversion. Primers are indicated by colour; OAT-1 (**black**), OAT-2 (**red**), OAT-3 (**green**) and OAT-4 (**purple**). Broken lines indicate genomic breakpoints. Circular arrows indicate an inversion event. The top illustration depicts how primers would anneal around the breakpoints in a control sample. The bottom illustration shows how the internal primers (OAT-2 and OAT-3) are shuffled in an inversion event to form new primer pairings, detectable by PCR analysis.

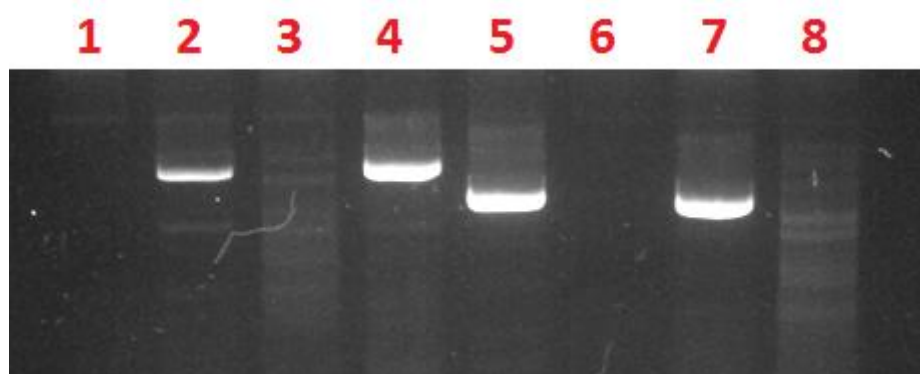

**Figure S2.** Confirmation of an *OAT* inversion using strategic PCR design. If the wildtype *OAT* sequence is present, the primer sets 1 + 2 and 3 + 4 can be used to generate a PCR product. If the inversion has occurred primer sets 1 + 3 and 2 + 4 can be used to generate of a PCR product. Unaffected patients are positive for products of a wildtype sequence. Patient H58 is positive only for inversion-specific products. Lane 1: Patient H58 Primers 1 and 2; Lane 2: Patient H58 Primers 3 and 4; Lane 3: Patient H58 Primers 1 and 3; Lane 4: Patient H58 Primers 2 and 4; Lane 5: Unaffected Patient Primers 1 and 2; Lane 6: Unaffected Patient Primers 3 and 4; Lane 7: Unaffected Patient Primers 1 and 3; Lane 8: Unaffected Patient Primers 2 and 4.

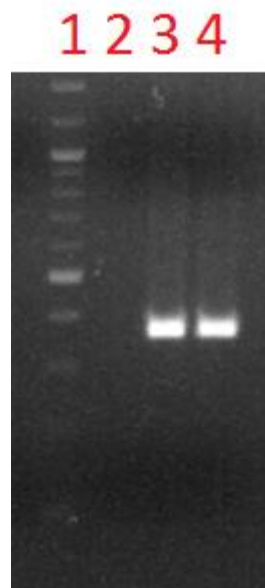

**Figure S3.** Gel confirmation of *USH2A* deletion. Primers were designed to target the region of deletion in affected patients C41 and E15. A product of the desired size (~300bp) would only be formed if the deletion was present. The sample from the unaffected sibling in the same pedigree, P36, did not form a product. A product was formed from the samples of C41 and E15. Lane 1: 100 bp Ladder; Lane 2: Unaffected Patient P36; Lane 3: Affected Patient C41; Lane 4: Affected Patient E15.

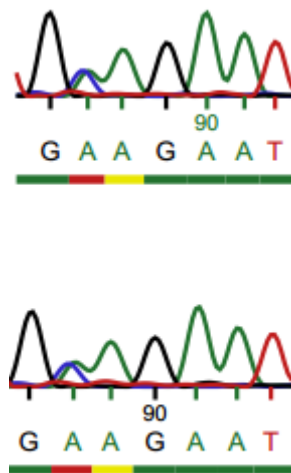

**Figure S4.** Sanger sequencing trace of *USH2A* mutation, p.Cys759Phe. The top trace is unaffected patient P36 and the bottom trace is affected patient E15. It is clear that both patients share the same heterozygous point mutation.

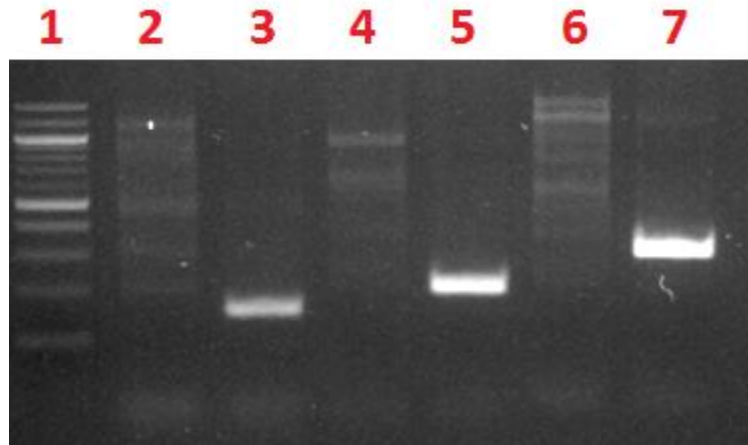

**Figure S5.** Analysis of *USH1C* deletion by use of PCR products. Primers were designed to amplify each exon believed to be deleted in Patient 1363. If the sequence for the exon was present a product would be formed. Exons 3 and 4 were designed as a single amplicon due to their proximity. The unaffected individual is positive for all of the *USH1C* exons. Patient 1363 is negative for all *USH1C* exons. Lane 1: 100 bp Ladder; Lane 2: Patient 1363 with primers for exon 1; Lane 3: Unaffected Patient with primers for exon 1; Lane 4: Patient 1363 with primers for exon 2; Lane 5: Unaffected Patient with primers for exon 2; Lane 6: Patient 1363 with primers for exons 3 + 4; Lane 7: Unaffected Patient with primers for exons 3 + 4.
